# Supplementary material for: Directed Evolution of Mycobacterium tuberculosis β-Lactamase Reveals Gatekeeper Residue That Regulates Antibiotic Resistance and Catalytic Efficiency
Source: PubMed Central journal article supplement (PMC3762836; doi:10.1371/journal.pone.0073123), 2013-09-04
Supplement: pone.0073123.s001.pdf [file pone.0073123.s001.pdf]

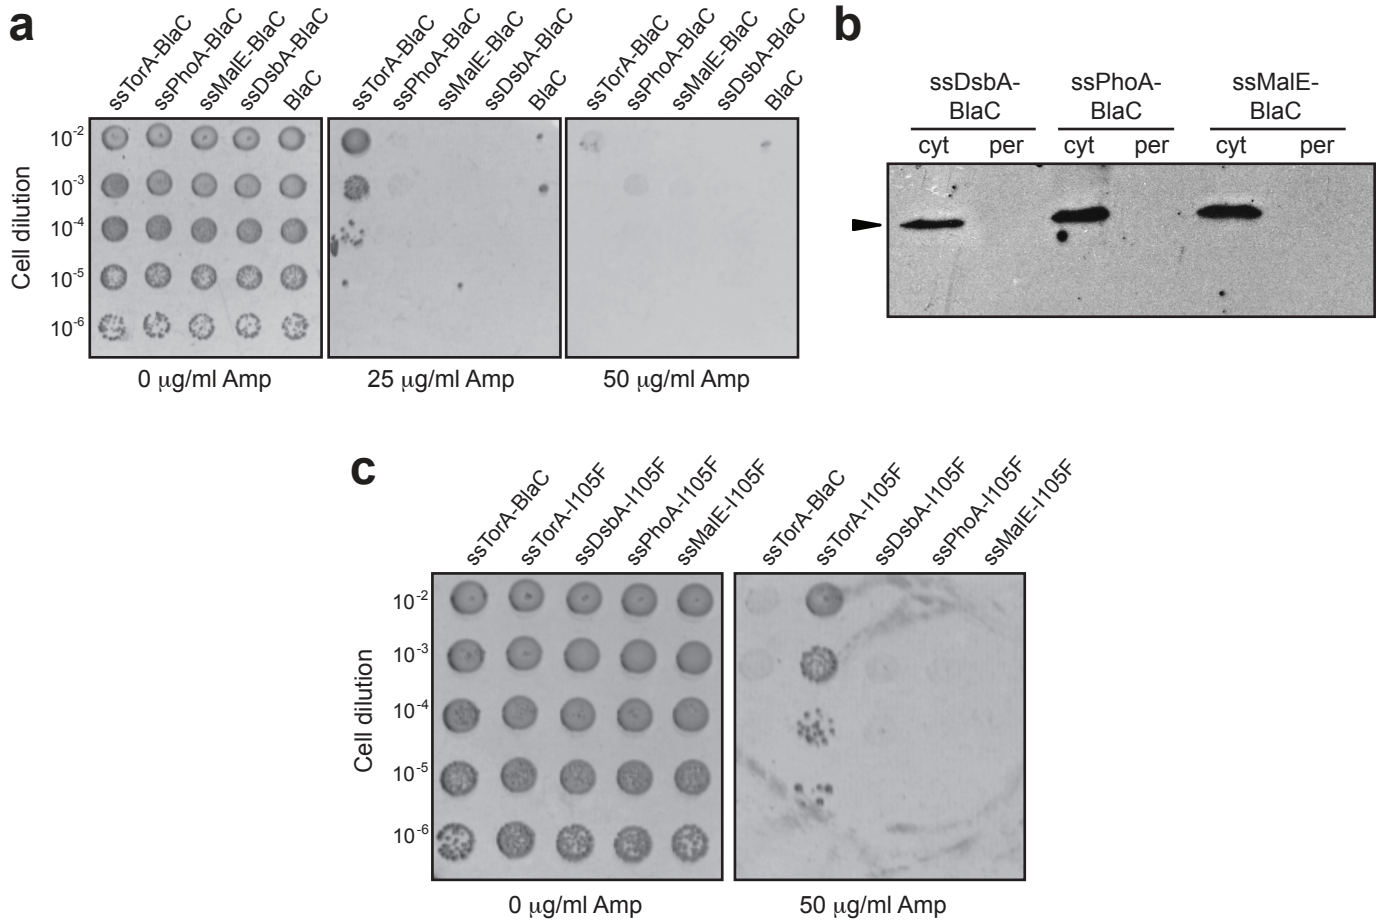

**Supplemental Figure S1. Evaluation of antibiotic resistance in *E. coli*.** (a) Serially diluted wt or  $\Delta$ *tatC* cells expressing ssTorA-BlaC, full-length BlaC, or BlaC hybrids with Sec- and SRP-dependent export signals. (b) Western blot analysis of cytoplasmic (cyt) and periplasmic (per) fractions prepared from wt cells expressing BlaC hybrids with Sec- and SRP-dependent export signals. Arrow indicates BlaC. Samples prepared from an equivalent number of cells were loaded in each lane. Blots were probed with anti-FLAG antibodies. (c) Serially diluted wt cells expressing ssTorA-BlaC, ssTorA-BlaC(I105F), or BlaC(I105F) hybrids with Sec- and SRP-dependent export signals were spotted on Amp.
