# Supplementary material for: Directed Evolution of Mycobacterium tuberculosis β-Lactamase Reveals Gatekeeper Residue That Regulates Antibiotic Resistance and Catalytic Efficiency
Source: PubMed Central journal article supplement (PMC3762836; doi:10.1371/journal.pone.0073123), 2013-09-04
Supplement: pone.0073123.s004.pdf [file pone.0073123.s004.pdf]

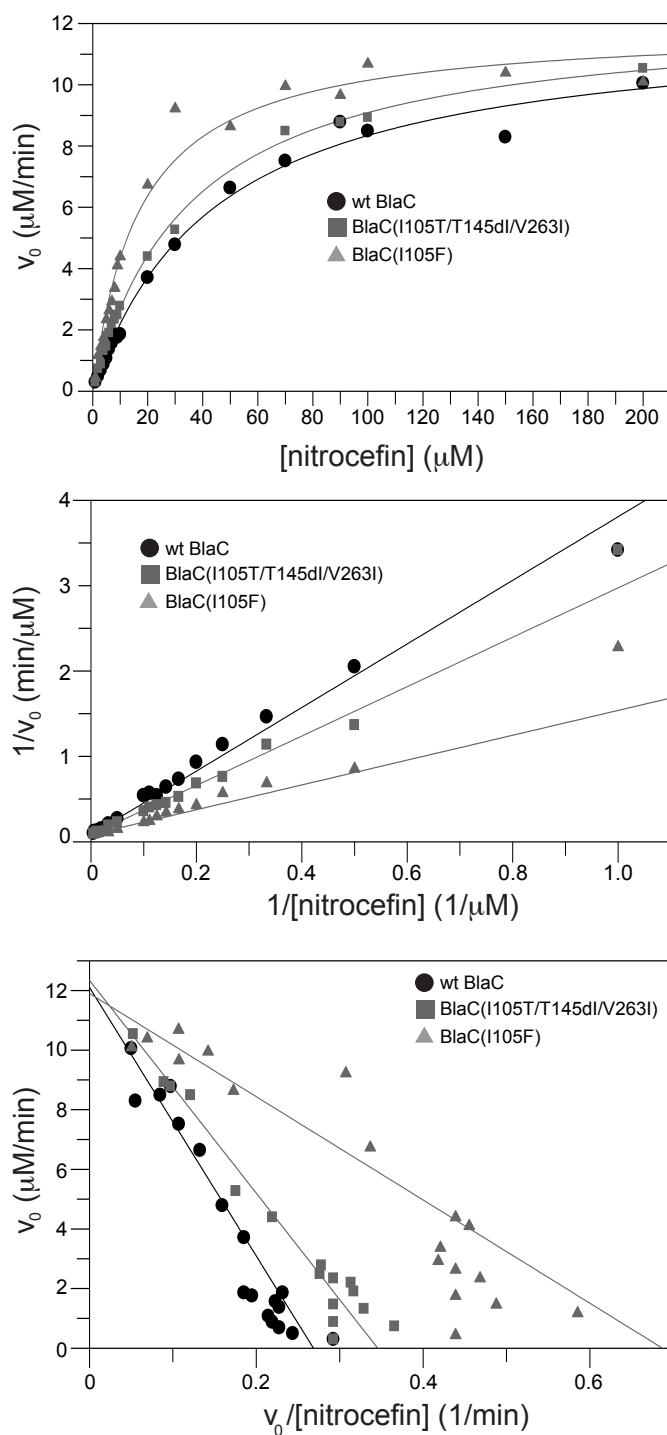

**Supplemental Figure S4. Kinetics of wt and mutant BlaC enzymes.** Michaelis-Menten kinetics (top), Lineweaver-Burk plot (middle), and Eadie-Hofstee plot (bottom) generated for wt BlaC and BlaC(I105F) enzymes with nitrocefin at single enzyme concentration (50  $\mu\text{M}$ ).
