# Supplementary material for: Directed Evolution of Mycobacterium tuberculosis β-Lactamase Reveals Gatekeeper Residue That Regulates Antibiotic Resistance and Catalytic Efficiency
Source: PubMed Central journal article supplement (PMC3762836; doi:10.1371/journal.pone.0073123), 2013-09-04
Supplement: pone.0073123.s005.pdf [file pone.0073123.s005.pdf]

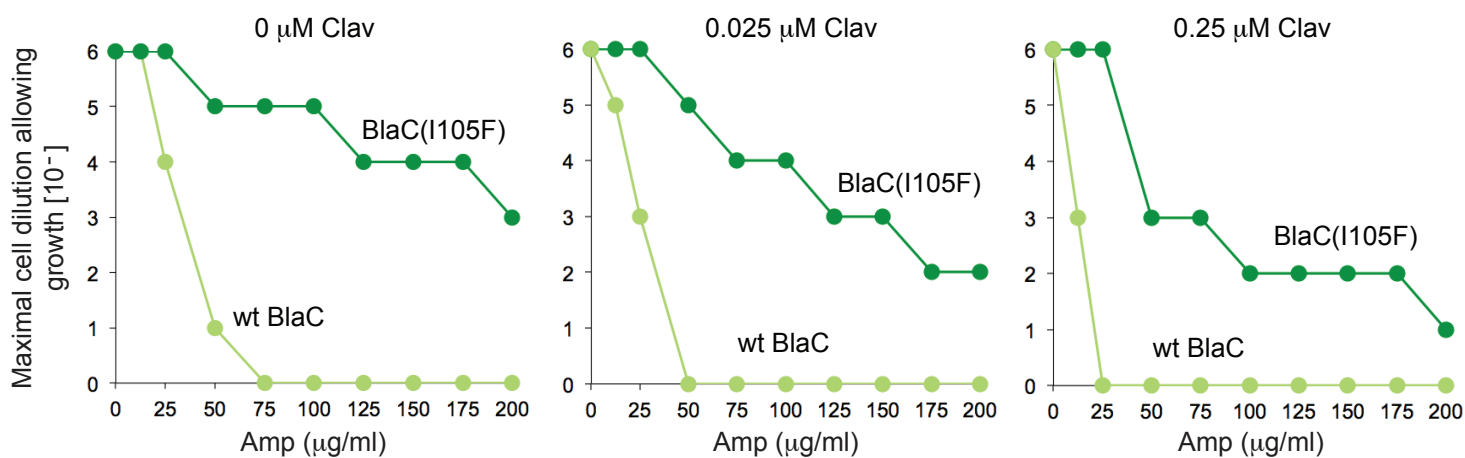

**Supplemental Figure S5. Bacterial susceptibility to Amp-Clav combination.** Amp resistance of wt cells expressing ssTorA-BlaC and ssTorA-BlaC(I105F) in the presence and absence of the inhibitor clavulanate as indicated. Maximal cell dilution that allowed growth is plotted versus Amp concentration.
