# Supplementary material for: Directed Evolution of Mycobacterium tuberculosis β-Lactamase Reveals Gatekeeper Residue That Regulates Antibiotic Resistance and Catalytic Efficiency
Source: PubMed Central journal article supplement (PMC3762836; doi:10.1371/journal.pone.0073123), 2013-09-04
Supplement: pone.0073123.s006.pdf [file pone.0073123.s006.pdf]

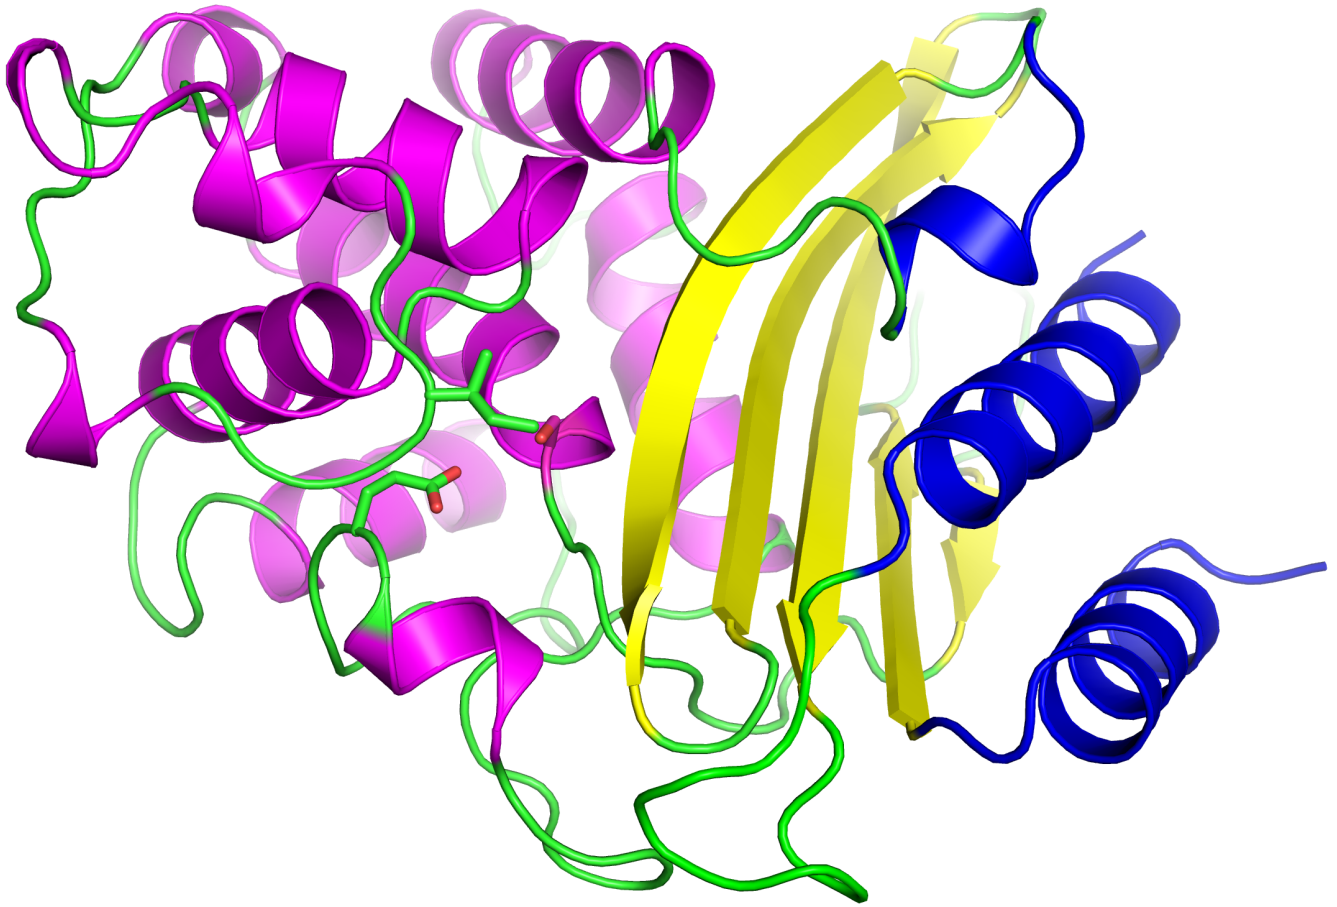

**Supplemental Figure S6.** Overall structure of full-length *M. tuberculosis* BlaC and its secondary structures. Clearly visible are the  $\alpha$  domain and an  $\alpha/\beta$  domain.
