# Supplementary material for: Directed Evolution of Mycobacterium tuberculosis β-Lactamase Reveals Gatekeeper Residue That Regulates Antibiotic Resistance and Catalytic Efficiency
Source: PubMed Central journal article supplement (PMC3762836; doi:10.1371/journal.pone.0073123), 2013-09-04
Supplement: pone.0073123.s007.pdf [file pone.0073123.s007.pdf]

**Supplemental Table S1. Additional kinetic parameters for BlaC enzymes**

| Enzyme                   | $V_{\max}$ ( $\mu\text{M}/\text{min}$ ) <sup>a</sup> | $K_m$ ( $\mu\text{M}$ ) <sup>a</sup> | $k_{\text{cat}}$ ( $\text{min}^{-1}$ ) <sup>a</sup> | $k_{\text{cat}}/K_m$ ( $\text{min}^{-1} \text{M}^{-1}$ ) <sup>a</sup> |
|--------------------------|------------------------------------------------------|--------------------------------------|-----------------------------------------------------|-----------------------------------------------------------------------|
| wt BlaC                  | 12.1 ± 0.4                                           | 45 ± 4                               | 2421 ± 88                                           | (5.4 ± 0.3) × 10 <sup>7</sup>                                         |
| BlaC(I105T/T145dl/V263I) | 12.3 ± 0.2                                           | 36 ± 1                               | 2468 ± 38                                           | (7.1 ± 0.2) × 10 <sup>7</sup>                                         |
| BlaC(I105F)              | 11.9 ± 0.4                                           | 16 ± 2                               | 2380 ± 80                                           | (1.5 ± 0.1) × 10 <sup>8</sup>                                         |

<sup>a</sup>Kinetic parameters determined using nitrocefin as substrate

**Supplemental Table S2. Antibiotic susceptibilities of *M. smegmatis* expressing BlaC enzymes**

| Strain        | Genotype                                       | Disk diffusion diameter (mm) <sup>1</sup> |                   |                                           |                                           |                                            |                                           |
|---------------|------------------------------------------------|-------------------------------------------|-------------------|-------------------------------------------|-------------------------------------------|--------------------------------------------|-------------------------------------------|
|               |                                                | Amp <sup>500</sup>                        | Amp <sup>50</sup> | Amp <sup>50</sup><br>Clav <sup>0.50</sup> | Amp <sup>50</sup><br>Clav <sup>0.25</sup> | Amp <sup>50</sup><br>Clav <sup>0.125</sup> | Amp <sup>50</sup><br>Clav <sup>0.06</sup> |
| PM965/pMV261  | ( $\Delta\text{blaSI}/\text{vector control}$ ) | 47 ± 1                                    | 29 ± 2            | -                                         | -                                         | -                                          | -                                         |
| PM965/pMP1070 | ( $\Delta\text{blaSI}/\text{blaC}+$ )          | 30 ± 1                                    | 15 ± 2            | 20 ± 1                                    | 19 ± 2                                    | 18 ± 2                                     | 15 ± 1                                    |
| PM965/pMP1071 | ( $\Delta\text{blaSI}/\text{blaC-I105F}+$ )    | 20 ± 2                                    | 0 ± 1             | 19 ± 1                                    | 18 ± 1                                    | 15 ± 1                                     | 11 ± 1                                    |

<sup>1</sup>For disk diffusion tests, the zones of inhibition are averages ± standard deviations of duplicate determinations for two independent cultures of each strain. Amp was used at a concentration of 500 or 50  $\mu\text{g}/\text{disk}$  as indicated and Clav was in the agar media at 0.06-0.50  $\mu\text{g}/\text{mL}$  as indicated.

**Supplemental Table S3. Data collection, processing, and refinement statistics**

| <b>Parameter</b>          | <b>Value for wt BlaC<sup>1</sup></b>                                      |
|---------------------------|---------------------------------------------------------------------------|
| Wavelength (Å)            | 1.000                                                                     |
| Resolution range (Å)      | 19.87 - 2.85 (2.95 - 2.85)                                                |
| Space group               | P2 <sub>1</sub>                                                           |
| Unit cell                 | a = 78.8 b = 96.5 c = 111.0<br>$\alpha = \gamma = 90 \quad \beta = 108.5$ |
| Total reflections         | 116897 (11344)                                                            |
| Unique reflections        | 36698 (3607)                                                              |
| Multiplicity              | 3.2 (3.2)                                                                 |
| Completeness (%)          | 99.7 (99.7)                                                               |
| Mean I/ $\sigma$ (I)      | 12.52 (4.07)                                                              |
| R-factor                  | 0.17 (0.24)                                                               |
| R-free                    | 0.22 (0.30)                                                               |
| Number of atoms           | 15936                                                                     |
| Macromolecules            | 7947                                                                      |
| Ligands                   | 85                                                                        |
| Water                     | 102                                                                       |
| Protein residues          | 1064                                                                      |
| RMS(bonds)                | 0.015                                                                     |
| RMS(angles)               | 1.44                                                                      |
| Ramachandran favored (%)  | 97                                                                        |
| Ramachandran outliers (%) | 0                                                                         |
| Clashscore                | 9.73                                                                      |
| Average B-factor          | 9.80                                                                      |
| Macromolecules            | 9.40                                                                      |
| Solvent                   | 7.10                                                                      |
| PDB accession code        | 3zhh                                                                      |

<sup>1</sup>Statistics for the highest resolution shell are shown in parentheses.
